# Supplementary material
Source: publisher site journal article supplement (https://www.spandidos-publications.com/1772/downloadSupplementary)

Figure S1. Representative images of immunohistochemical staining of CK and Ki-67 in 4-NQO-induced tumor samples, properties of the JC1-2 cell line, Mhc I expression of JC1 and JC1-2 cells and expressions of EGFR in JC1-2 cell line following co-culture with different types of splenocytes. (A) Representative images of immunohistochemical staining of CK (left panel) and Ki-67 (right panel) in 4-NQO-induced tumor samples. (B) Morphology of JC1-2 cells in culture. (C) Distribution of the cell cycle of the JC1-2 cell line. (D) mRNA expression of Mhc in JC1 and JC1-2 cells. (E) mRNA expression of EGFR in co-cultured JC1 cells (n=3). (F) Expression of EGFR assessed by flow cytometry of differently treated JC1-2 cells. Scale bar, 100  $\mu$ m. ns, not significant ( $P>0.05$ ).

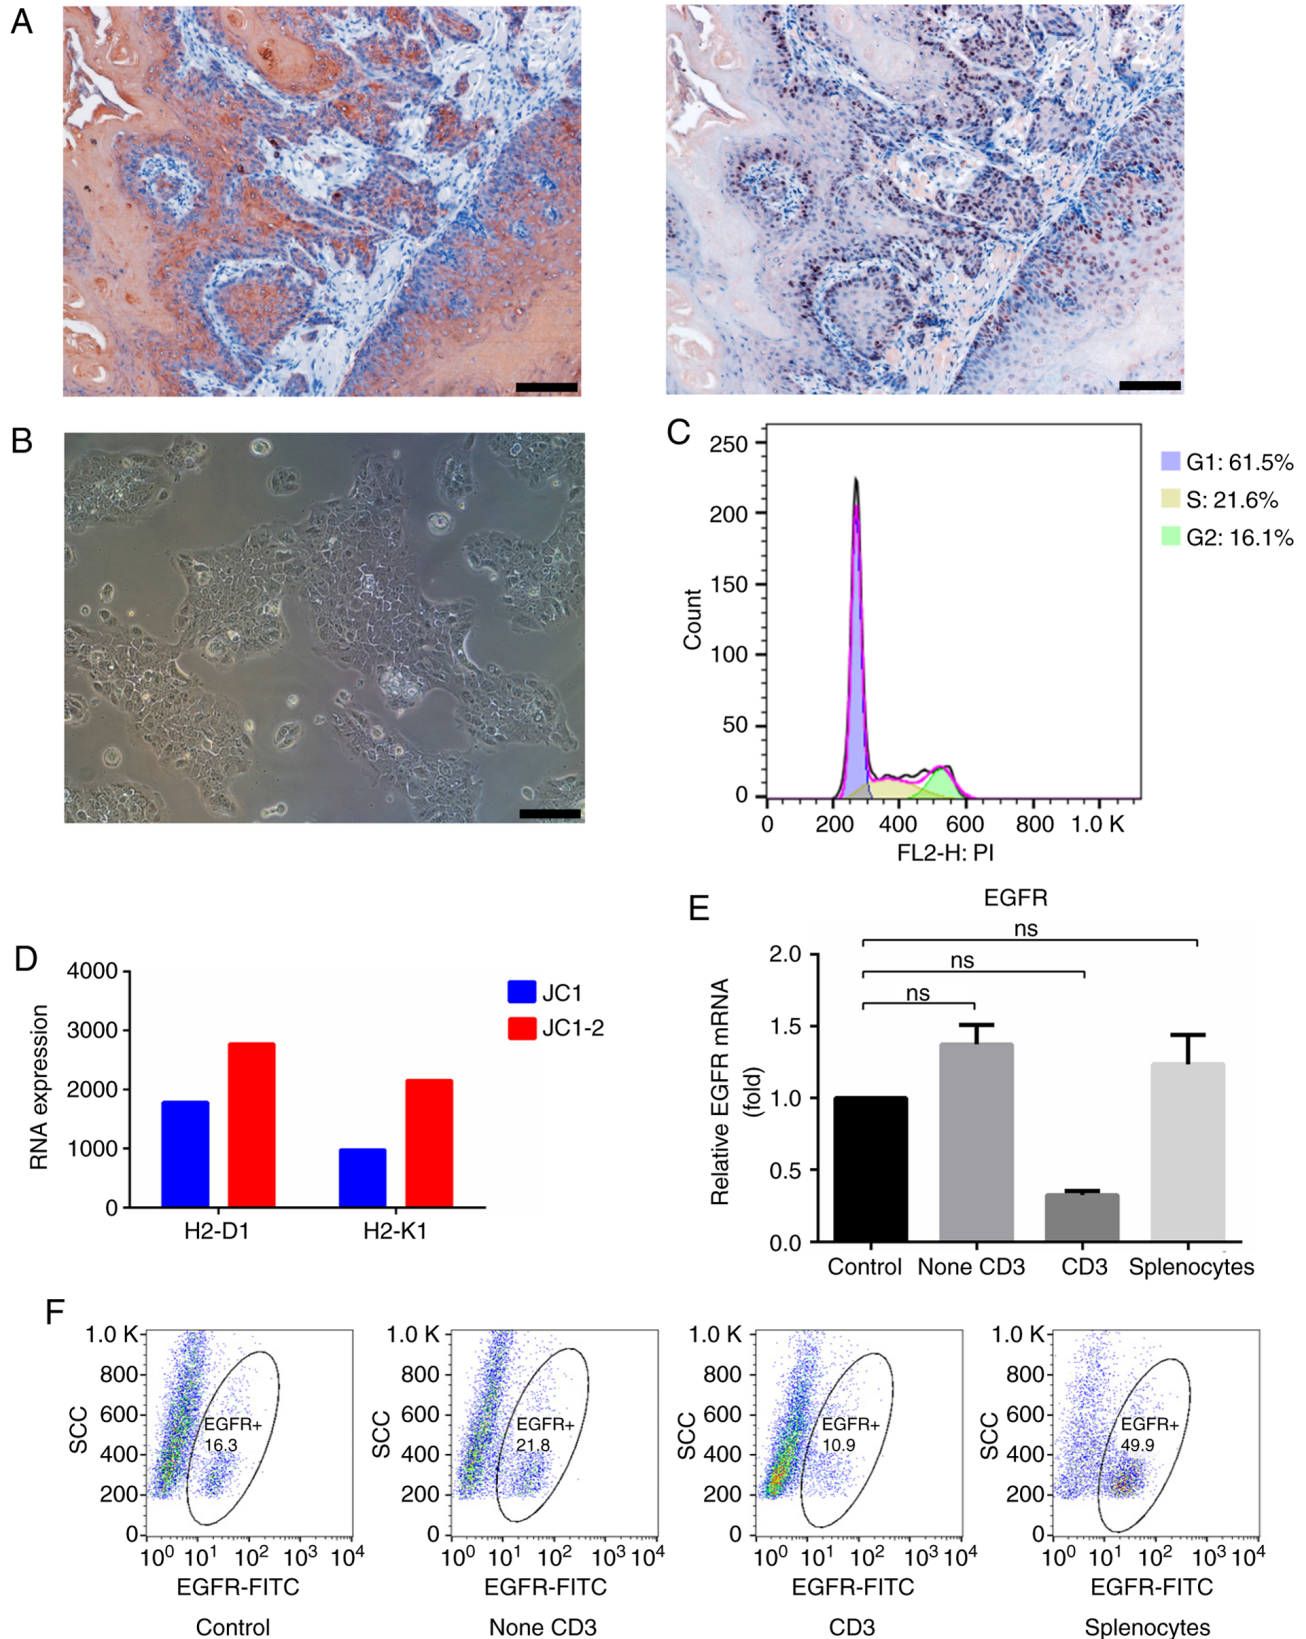

Supplement: Supplementary file 1 [file downloadSupplementary]
